## CORRECTION

# Correction: Antibacterial Activity and Mechanism of a Scorpion Venom Peptide Derivative *In Vitro* and *In Vivo*

Luyang Cao, Chao Dai, Zhongjie Li, Zheng Fan, Yu Song, Yingliang Wu, Zhijian Cao, Wenxin Li

There is an error in [Fig 3](#). Panel 'g' is missing from [Fig 3](#). Please see the correct [Fig 3](#) here.

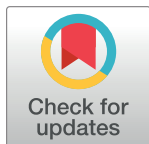

## OPEN ACCESS

**Citation:** Cao L, Dai C, Li Z, Fan Z, Song Y, Wu Y, et al. (2024) Correction: Antibacterial Activity and Mechanism of a Scorpion Venom Peptide Derivative *In Vitro* and *In Vivo*. PLoS ONE 19(12): e0315211. <https://doi.org/10.1371/journal.pone.0315211>

**Published:** December 4, 2024

**Copyright:** © 2024 Cao et al. This is an open access article distributed under the terms of the [Creative Commons Attribution License](#), which permits unrestricted use, distribution, and reproduction in any medium, provided the original author and source are credited.

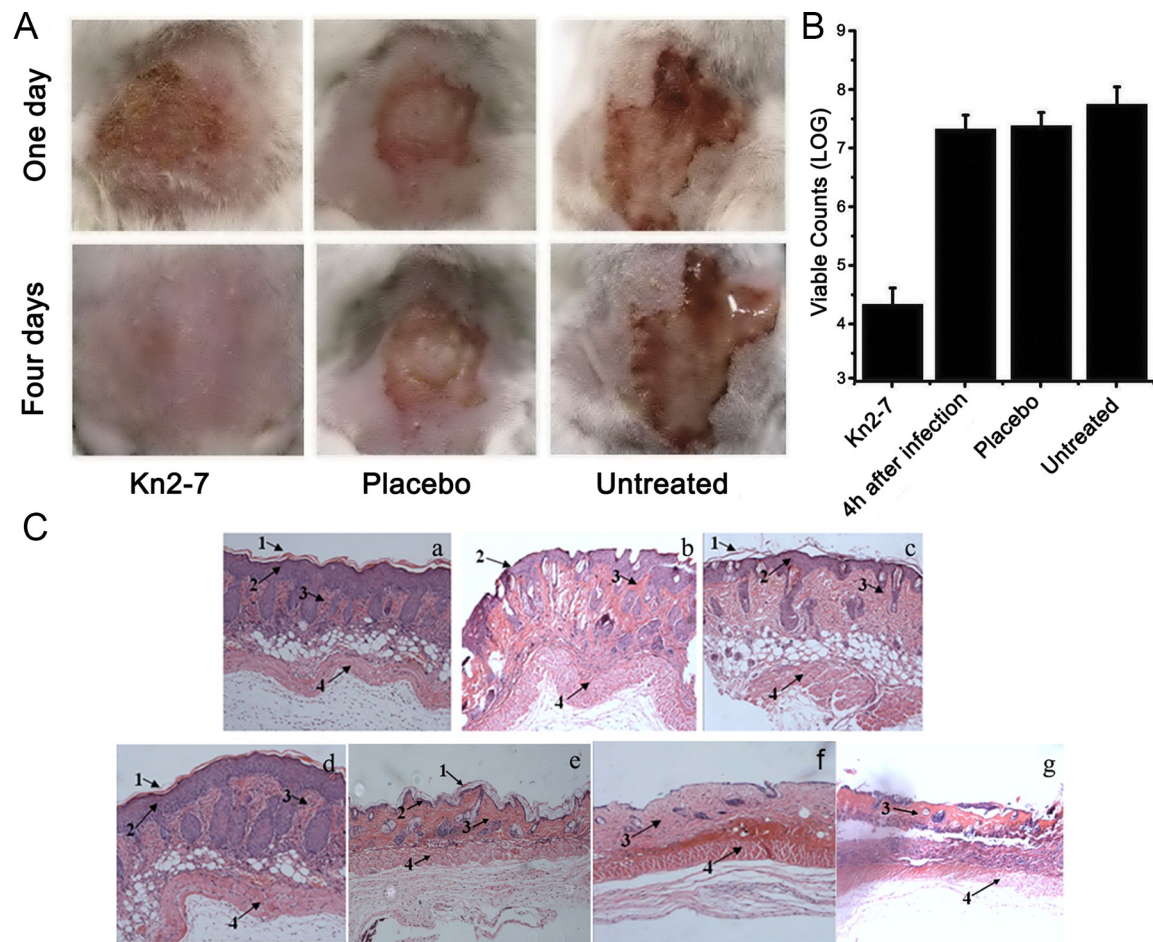

**Fig 3. *In vivo* antibacterial activity of Kn2-7.** (A) Mice were observed after being treated with the peptide on days 1 and 4. (B) Cutaneous viable counts in treated mice. Eight mice per group were euthanized, and the viable counts of the surviving *S. aureus* bacteria were then determined. (C) Histological morphologies of the skin in treated mice. (a) Normal dorsal skin of mice. (b) Immediately after the skin was scratched. (c) Four days after the skin was scratched. (d) Four days after *S. aureus* infection in skin treated with Kn2-7. (e) Four days after *S. aureus* infection in skin treated with BmKn2. (f) Four days after *S. aureus* infection in skin treated with a placebo. (g) Four days after *S. aureus* infection in untreated skin. Numbered arrows indicate the following: 1, corneum; 2, epidermis; 3, dermis; and 4, muscular layer.

<https://doi.org/10.1371/journal.pone.0315211.g001>

## Reference

1. Cao L, Dai C, Li Z, Fan Z, Song Y, Wu Y, et al. (2012) Antibacterial Activity and Mechanism of a Scorpion Venom Peptide Derivative *In Vitro* and *In Vivo*. PLOS ONE 7(7): e40135. <https://doi.org/10.1371/journal.pone.0040135>
